# Supplementary material for: Role of hepatocyte RIPK1 in maintaining liver homeostasis during metabolic challenges
Source: eLife journal article supplement (doi:10.7554/elife.96798), 2024-06-19

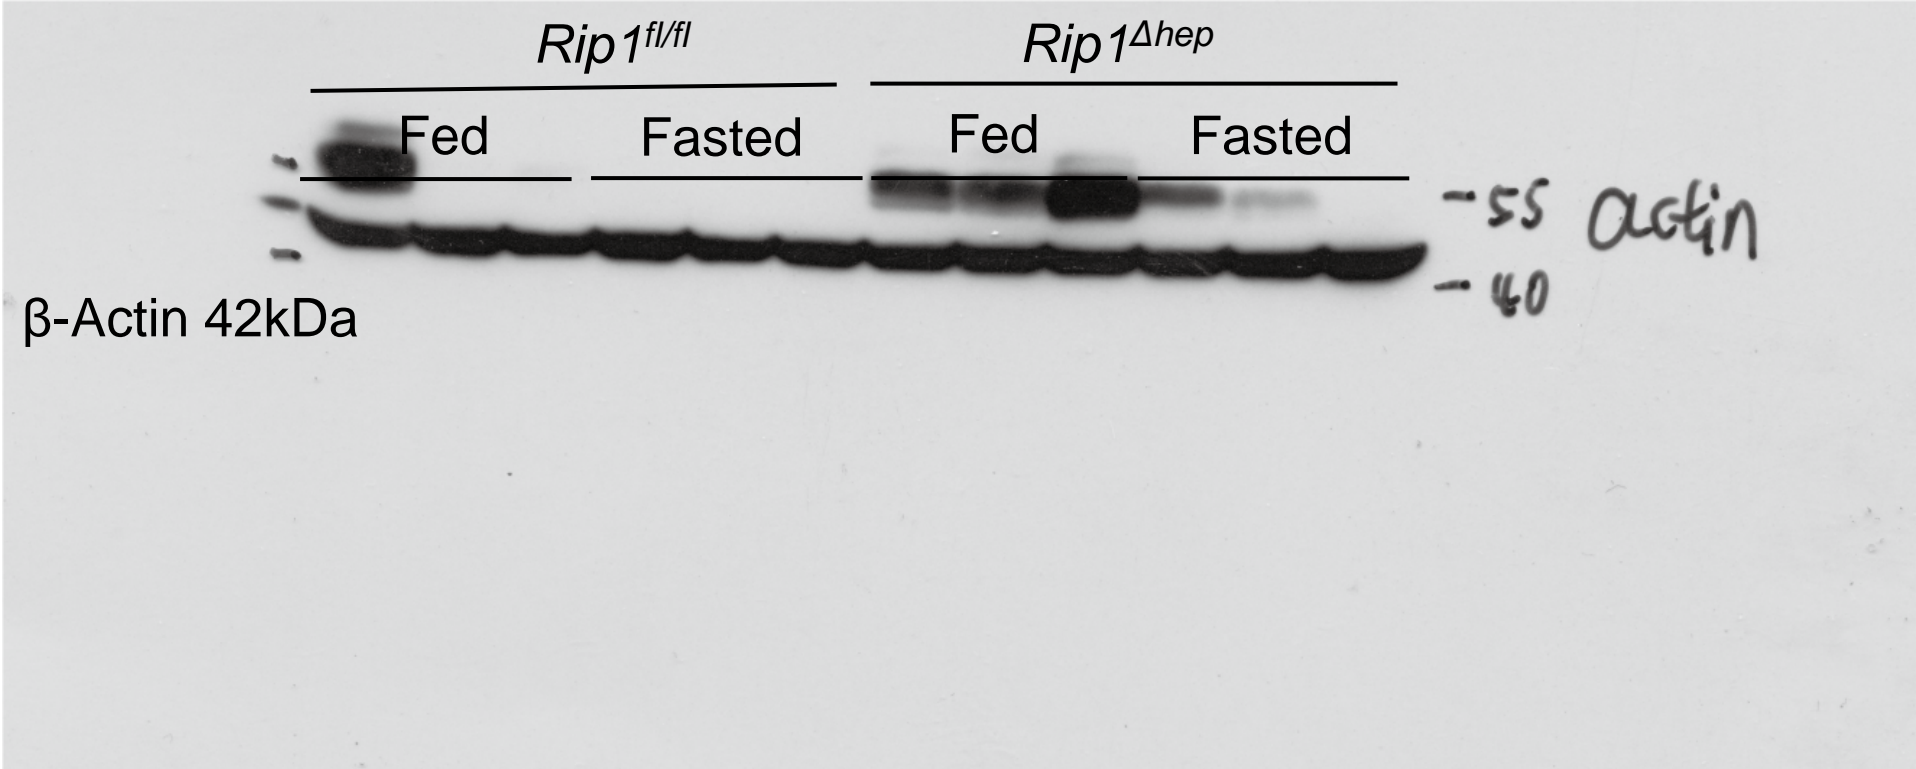

170-  
130-  
65-  
70-

*Rip1<sup>fl/fl</sup>*

*Rip1<sup>Δhep</sup>*

Fed

Fasted

Fed

Fasted

-170

-130 RI

-100

RIPK1 78kDa

-70

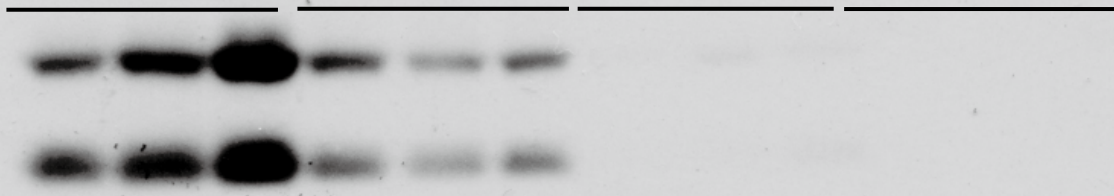

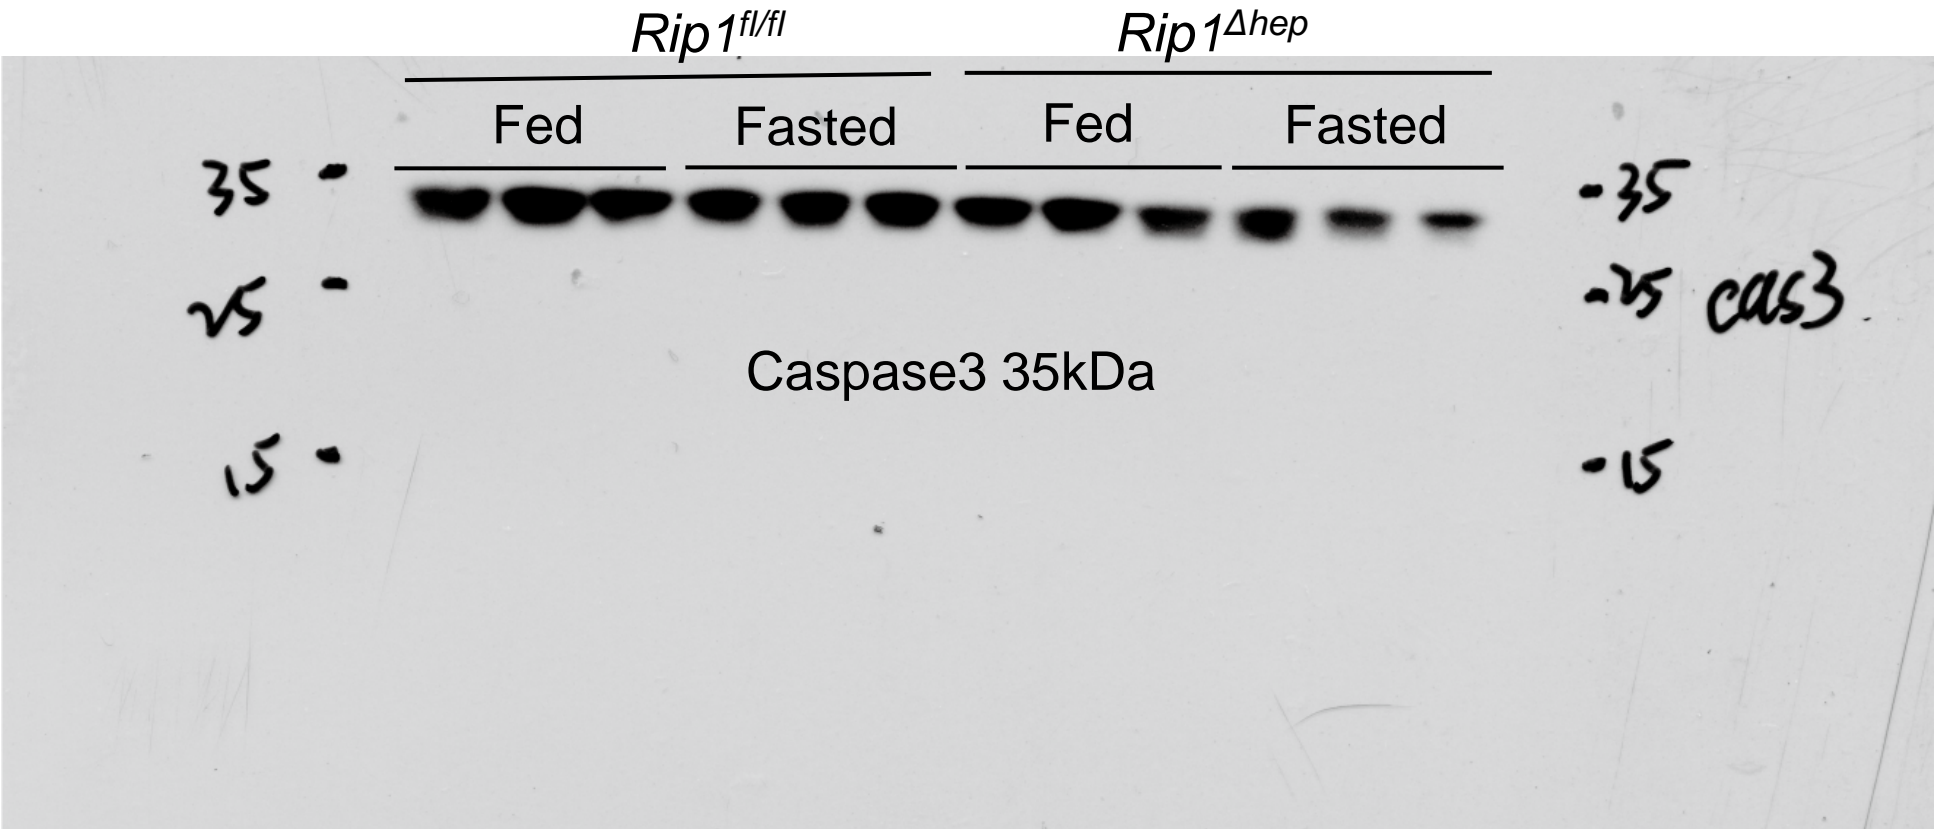

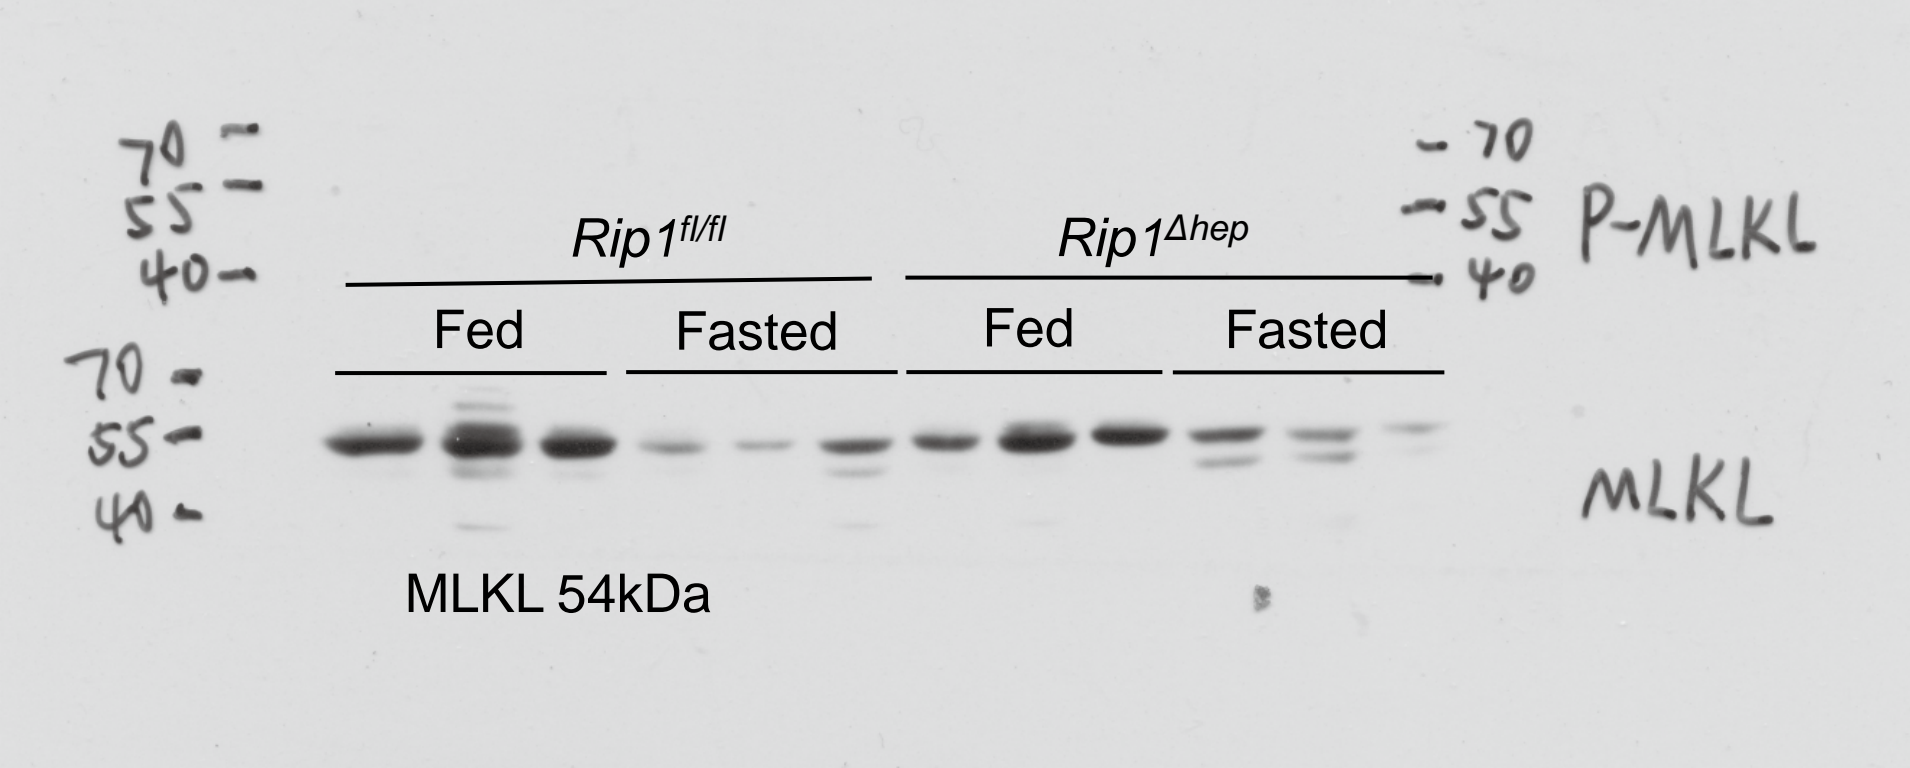

Supplement: fig1-figsupp1-data1 [file elife-96798-fig1-figsupp1-data1-v1.pdf]
