# Supplementary material for: Role of hepatocyte RIPK1 in maintaining liver homeostasis during metabolic challenges
Source: eLife journal article supplement (doi:10.7554/elife.96798), 2024-06-19

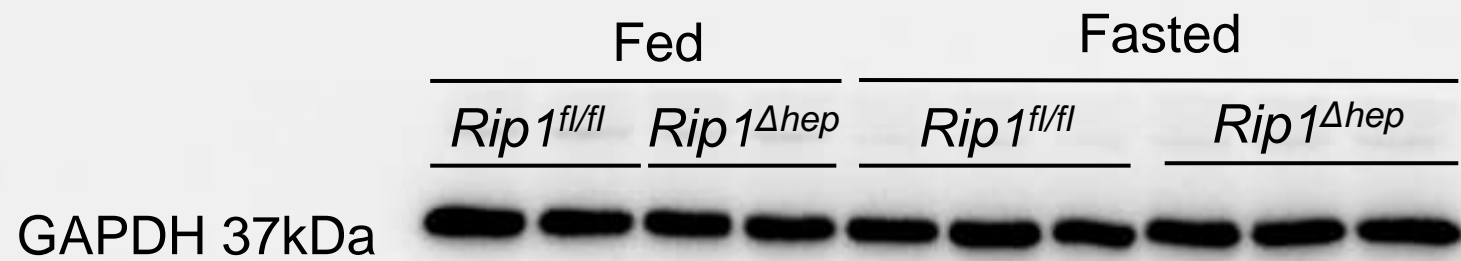

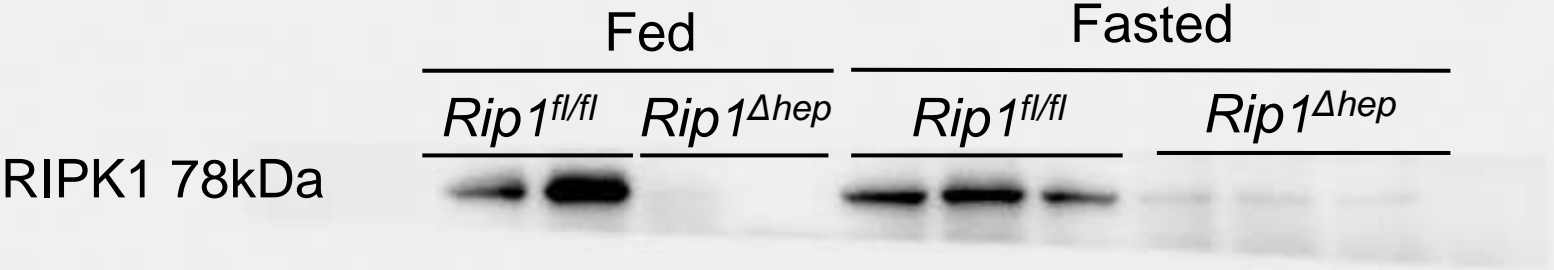

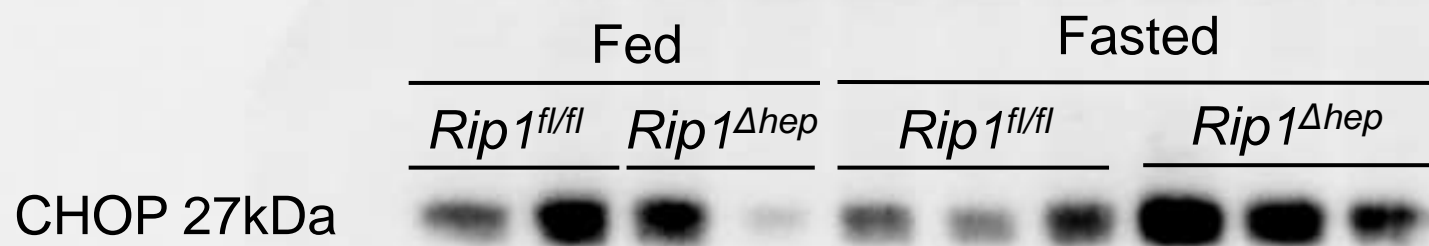

BIP 78kDa

| Fed                         |                            | Fasted                      |                            |
|-----------------------------|----------------------------|-----------------------------|----------------------------|
| <i>Rip1<sup>fl/fl</sup></i> | <i>Rip1<sup>Δhep</sup></i> | <i>Rip1<sup>fl/fl</sup></i> | <i>Rip1<sup>Δhep</sup></i> |

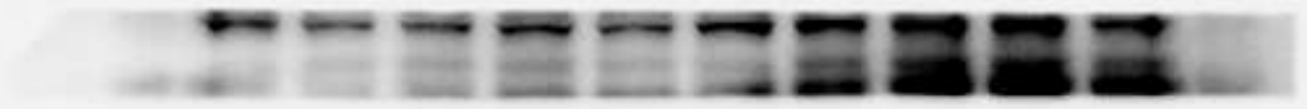

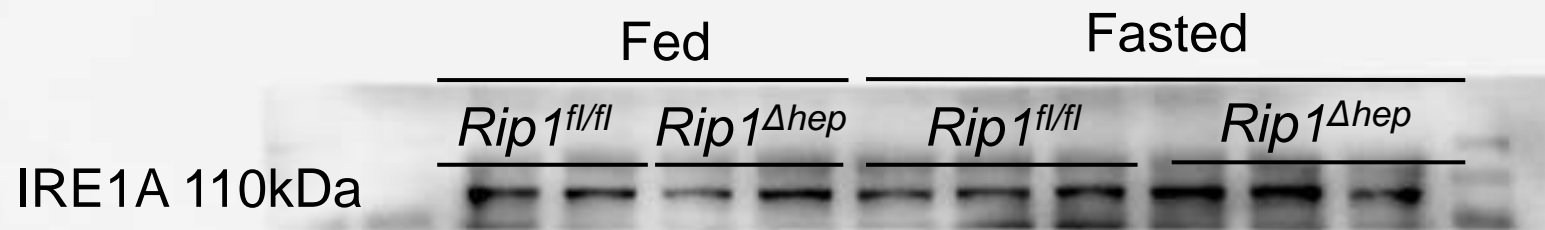

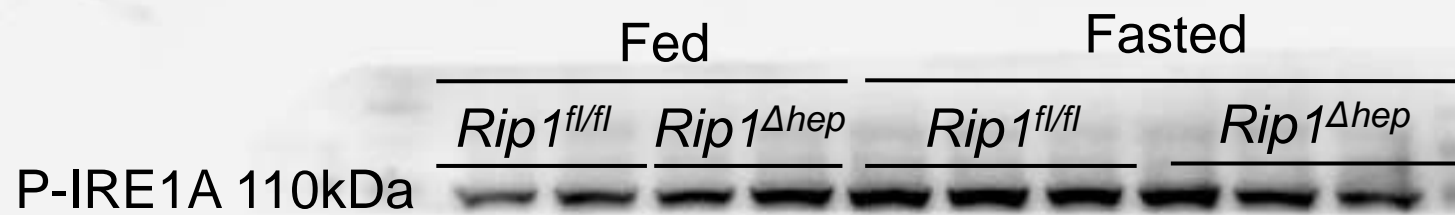

Supplement: fig5-data1 [file elife-96798-fig5-data1-v1.pdf]
