# Supplementary material for: Role of hepatocyte RIPK1 in maintaining liver homeostasis during metabolic challenges
Source: eLife journal article supplement (doi:10.7554/elife.96798), 2024-06-19
Supplement: fig6-data1 [file elife-96798-fig6-data1-v1.pdf]

GAPDH 37kDa

AAV-TBG-null    AAV-TBG-Cre

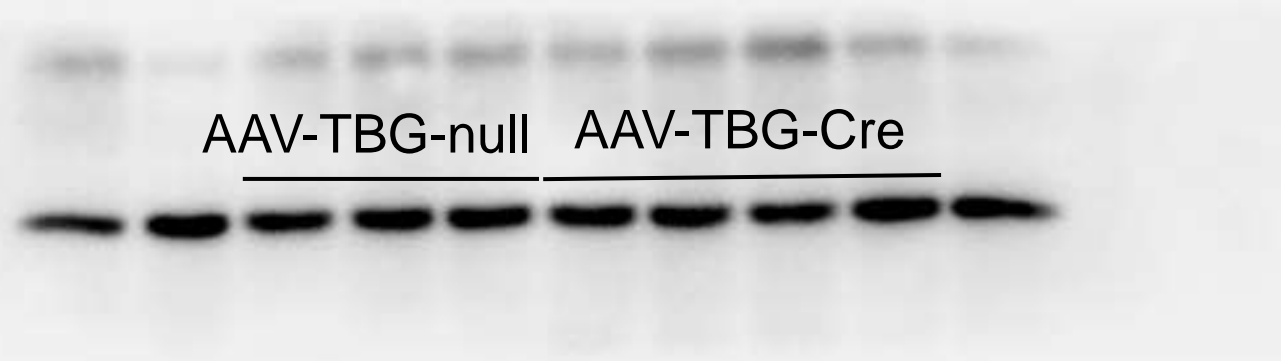

RIPK1 78kDa

AAV-TBG-null

AAV-TBG-Cre

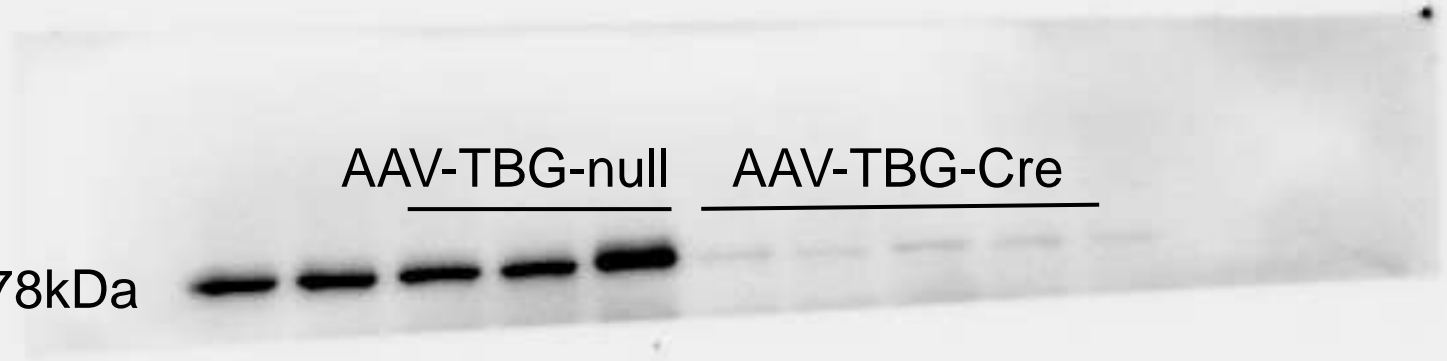

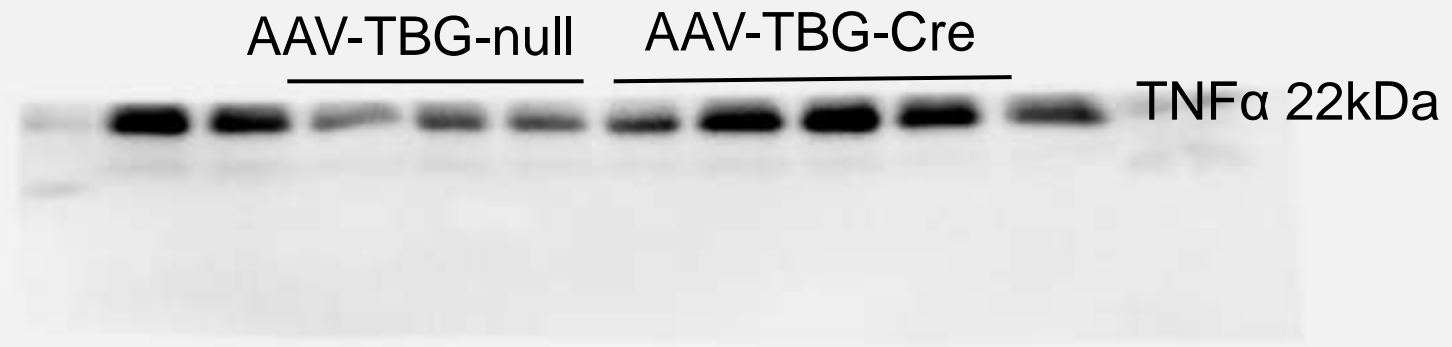



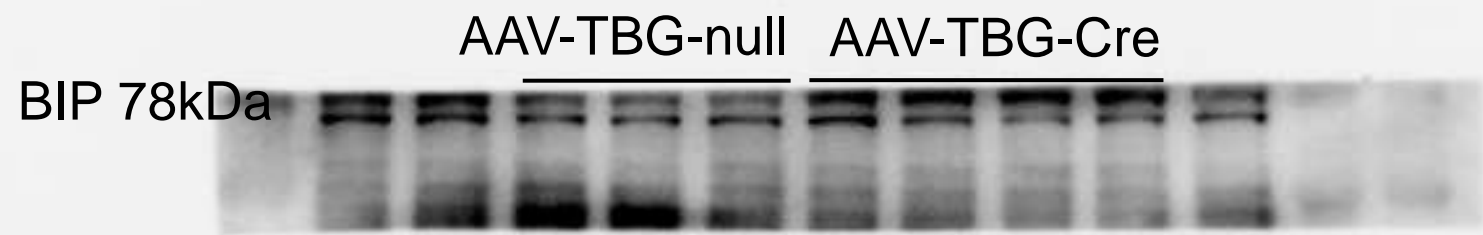

IRE1 $\alpha$  110kDa

AAV-TBG-null

AAV-TBG-Cre

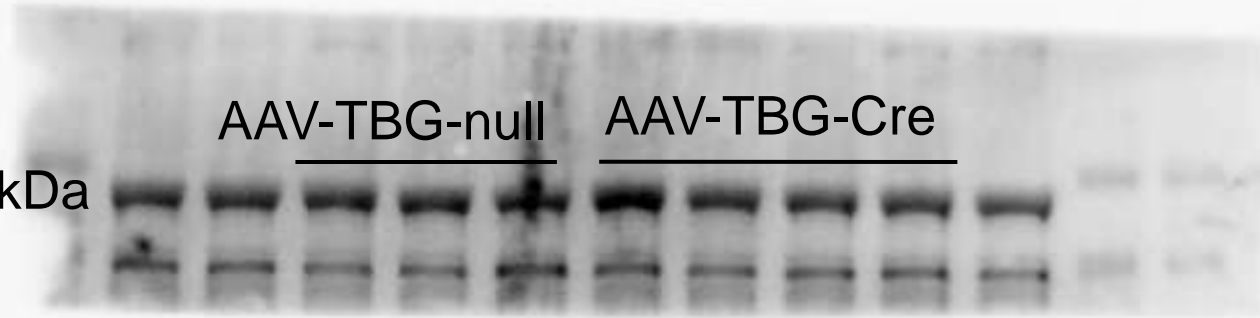

pIRE1 $\alpha$  110kDa

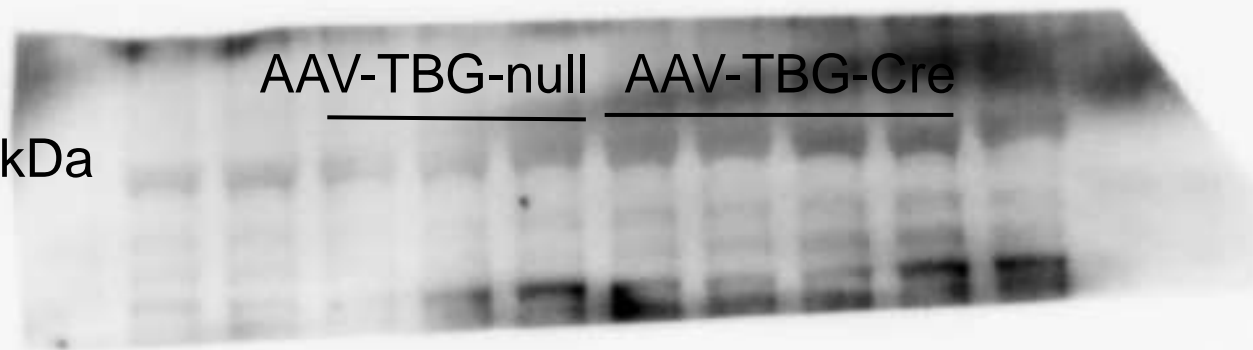

AAV-TBG-null AAV-TBG-Cre
